# Supplementary material for: Barriers and facilitators of adherence to antidepressants among outpatients with major depressive disorder: A qualitative study
Source: PubMed Central journal article supplement (PMC5470687; doi:10.1371/journal.pone.0179290), 2017-06-14
Supplement: pone.0179290.s001.pdf [file pone.0179290.s001.pdf]

**Research Title:**

**Barriers and facilitators to adherence with antidepressants among major depressive disorder: A qualitative study**

---

**SECTION A: DEMOGRAPHIC AND CLINICAL BACKGROUND DATA COLLECTION FORM**

1. Age (years):

\_\_\_\_\_ years old

2. Gender:

- Male
- Female

3. Ethnicity:

- Malay
- Chinese
- Indian

4. Religion:

- Islam
- Buddhist
- Hindu
- Christian
- Other \_\_\_\_\_

5. Current marital status:

- Single
- Married
- Divorced
- Widowed
- Separated

6. Current household income/month (RM):

- < 1500
- 1501 – 2500
- 2501 – 3500
- 3501 - 4500
- >4500

7. Highest level of education you have completed:

- None
- Primary school
- Secondary school
- Diploma
- University or higher

8. Current employment:

- Unemployed
- Housewife
- Student
- Self-employed
- Retired
- Others \_\_\_\_\_

9. When were you first diagnosed with depression?

Year \_\_\_\_\_

10. When were you first prescribed with antidepressant?

Year \_\_\_\_\_

**Research Title:**

**Barriers and facilitators to adherence with antidepressants among major depressive disorder: A qualitative study**

---

11. What are the name and dose of antidepressants that you currently take?

(eg: T. Sertraline 50mg once a day) -*information obtained from patient's BHT*

|       |       |
|-------|-------|
| _____ | _____ |
| _____ | _____ |
| _____ | _____ |

12. What other medical illnesses (co-morbid) do you have for which you take medication?

(eg: Hypertension, Diabetes, cancer, kidney failure, etc)- *Information obtained from patient's BHT*

|       |       |
|-------|-------|
| _____ | _____ |
| _____ | _____ |
| _____ | _____ |

13. What other medication do you take apart from antidepressants?

Please state medication's name and dosage taken. (eg: T. Atenolol 100mg for hypertension)

-*information obtained from patient's BHT*

|       |       |
|-------|-------|
| _____ | _____ |
| _____ | _____ |
| _____ | _____ |
| _____ | _____ |

**Research Title:**

**Barriers and facilitators to adherence with antidepressants among major depressive disorder: A qualitative study**

**SECTION B: INTERVIEW GUIDE**

| <b>Background</b>                                   |                                                                                                                                                                                                                                                                                                                                                                                                  |
|-----------------------------------------------------|--------------------------------------------------------------------------------------------------------------------------------------------------------------------------------------------------------------------------------------------------------------------------------------------------------------------------------------------------------------------------------------------------|
| 1) Depression duration                              | How long have you had depression? ( <i>.....months/years</i> )                                                                                                                                                                                                                                                                                                                                   |
| 2) Antidepressant duration                          | I understand that you are taking medication for your depression am I right? How long have you been taking it? ( <i>.....months/years</i> )                                                                                                                                                                                                                                                       |
| <b>Medications and Adherence</b>                    |                                                                                                                                                                                                                                                                                                                                                                                                  |
| 1) How it started                                   | How do you take your antidepressant at home?                                                                                                                                                                                                                                                                                                                                                     |
| <i>Probe</i>                                        | <i>Is anyone assisting you take your medication?<br/>(family/friends/care giver?)<br/>How are they helping?</i>                                                                                                                                                                                                                                                                                  |
| 2) Influencing factors<br>(barriers & facilitators) | What difficulties/problems do you face when taking your antidepressants as prescribed by your doctor?<br>Do you have at any situations/factors that make it hard for you to take your antidepressant as prescribed by your doctor? ( <i>if yes, can you describe the situation?</i> )<br>What situations/factors make it easy for you to take your antidepressants as prescribed by your doctor? |
| 3) Perception/view on antidepressants               | How do you feel about your antidepressants?<br>Do you plan to change the way you take your antidepressants? ( <i>if yes, how and why?</i> )                                                                                                                                                                                                                                                      |
| 4) Needs                                            | What are your concerns about your antidepressants? What do you think could be done to help you take your medication? ( <i>patient's point of view</i> )                                                                                                                                                                                                                                          |
| <i>Probe</i>                                        | <i>What can your family members do to help you?<br/>What can you yourself do to help you take your antidepressants?<br/>How can healthcare providers (Dr./Ph./nurses) assist you to take your medication for depression?</i>                                                                                                                                                                     |

**Research Title:**

**Barriers and facilitators to adherence with antidepressants among major depressive disorder: A qualitative study**

|                                |                                                                                                                                                             |
|--------------------------------|-------------------------------------------------------------------------------------------------------------------------------------------------------------|
|                                | What are the ways that can help you take your antidepressants as prescribed by the doctor?                                                                  |
| <i>Probe</i>                   | <i>What helps you remember to take your medication?</i>                                                                                                     |
| <b>Beliefs and Experiences</b> |                                                                                                                                                             |
| 1) Illness                     | Do you have any religious or cultural beliefs which might influence the way you feel about your depression? <i>(If yes, how &amp; why? /If no, why no?)</i> |
|                                | How do your family and friends/co-worker feel about your depression?                                                                                        |
| 2) Medication/treatment        | Do you seek any spiritual or religious help for your depression? <i>(if yes, how &amp; why? If no, why no?)</i>                                             |
|                                | Have you ever stopped taking your antidepressants because of your religious or cultural beliefs? <i>(If yes, how &amp; why?/If no, why no?)</i>             |
|                                | Have you ever used/are you currently using herbal/traditional medicines for your depression? <i>(if yes, what &amp; why?)</i>                               |
| <b>Wrap Up</b>                 |                                                                                                                                                             |
|                                | Do you have anything else to share regarding your depression or your antidepressants?                                                                       |
|                                | Is there anything that you will like to ask me?                                                                                                             |
|                                | How did you feel about this interview?                                                                                                                      |

**~END OF INTERVIEW~**
